# Supplementary material
Source: ML conference proceedings conference paper supplement (https://proceedings.neurips.cc/paper_files/paper/2016/hash/dd77279f7d325eec933f05b1672f6a1f-Abstract.html)
Supplement: Supplementary file [file dd77279f7d325eec933f05b1672f6a1f-Supplemental.zip]

## A Proof of query complexities

### A.1 Properties of adaptive sequential testing in Procedure 2

**Lemma 1.** Suppose  $\{X_i\}_{i=1}^\infty$  is a sequence of i.i.d. random variables such that  $\mathbb{E}X_i \leq 0$ ,  $|X_i| \leq 1$ . Let  $\delta > 0$ . Then with probability at least  $1 - \delta$ , for all  $n \in \mathbb{N}$  simultaneously  $\text{CheckSignificant}(\{X_i\}_{i=1}^n, \delta)$  in Procedure 2 returns false.

*Proof.* This is immediate by applying Proposition 1 to  $X_i - \mathbb{E}X_i$ .  $\square$

**Lemma 2.** Suppose  $\{X_i\}_{i=1}^\infty$  is a sequence of i.i.d. random variables such that  $\mathbb{E}X_i > \epsilon > 0$ ,  $|X_i| \leq 1$ . Let  $\delta \in [0, \frac{1}{3}]$ ,  $N \geq \frac{\xi}{\epsilon^2} \ln \frac{1}{\delta} [\ln \ln]_+ \frac{1}{\epsilon}$  ( $\xi$  is an absolute constant specified in the proof). Then with probability at least  $1 - \delta$ ,  $\text{CheckSignificant}(\{X_i\}_{i=1}^N, \delta)$  in Procedure 2 returns true.

*Proof.* Let  $S_N = \sum_{i=1}^N X_i$ .  $\text{CheckSignificant}(\{X_i\}_{i=1}^N, \delta)$  returns false if and only if  $S_N \leq D_0 \left(1 + \ln \frac{1}{\delta} + \sqrt{N([\ln \ln]_+ N + \ln \frac{1}{\delta})}\right)$ .

$$\begin{aligned} & \Pr \left( S_N \leq D_0 \left(1 + \ln \frac{1}{\delta} + \sqrt{N([\ln \ln]_+ N + \ln \frac{1}{\delta})}\right) \right) \\ & \leq \Pr \left( S_N \leq D_0 \left(1 + \ln \frac{1}{\delta} + \sqrt{N[\ln \ln]_+ N} + \sqrt{N \ln \frac{1}{\delta}}\right) \right) \\ & \leq \Pr \left( S_N - N\mathbb{E}X_i \leq D_0 \left(1 + \ln \frac{1}{\delta} + \sqrt{N[\ln \ln]_+ N} + \sqrt{N \ln \frac{1}{\delta}}\right) - N\epsilon \right) \end{aligned}$$

Suppose  $N = \frac{c\xi}{\epsilon^2} \ln \frac{1}{\delta} [\ln \ln]_+ \frac{1}{\epsilon}$  for constant  $c \geq 1$  and  $\xi$ .  $\xi$  is set to be sufficiently large, such that (1)  $\xi \geq 4D_0^2$ ; (2)  $\frac{2D_0}{\sqrt{\xi}} + D_0 \left(3 + \sqrt{[\ln \ln]_+ \xi}\right) + D_0 - \sqrt{\xi}/2 \leq -\sqrt{\frac{1}{2}}$ ; (3)  $f(x) = D_0 \sqrt{[\ln \ln]_+ x} - \sqrt{x}/2$  is decreasing when  $x > \xi$ . Here (2) is satisfiable since  $\frac{D_0}{\sqrt{\xi}} + D_0 \sqrt{[\ln \ln]_+ \xi} - \sqrt{\xi}/2 \rightarrow -\infty$  as  $\xi \rightarrow \infty$ , (3) is satisfiable since  $f'(x) \rightarrow -\infty$  as  $x \rightarrow \infty$ . (2) and (3) together implies  $\frac{2D_0}{\sqrt{\xi}} + D_0 \left(3 + \sqrt{[\ln \ln]_+ c\xi}\right) + D_0 - \sqrt{c\xi}/2 \leq -\sqrt{\frac{1}{2}}$ .

$$\begin{aligned} & \frac{1}{\sqrt{N}} \left( D_0 \left(1 + \ln \frac{1}{\delta} + \sqrt{N[\ln \ln]_+ N} + \sqrt{N \ln \frac{1}{\delta}}\right) - N\epsilon \right) \\ & = \sqrt{\ln \frac{1}{\delta}} \left( \frac{D_0 \epsilon (1 + \ln \frac{1}{\delta})}{\sqrt{c\xi [\ln \ln]_+ \frac{1}{\epsilon} \ln \frac{1}{\delta}}} + D_0 \sqrt{\frac{[\ln \ln]_+ \left( \frac{c\xi}{\epsilon^2} \ln \frac{1}{\delta} [\ln \ln]_+ \frac{1}{\epsilon} \right)}{\ln \frac{1}{\delta}}} + D_0 - \sqrt{c\xi [\ln \ln]_+ \frac{1}{\epsilon}} \right) \end{aligned}$$

Since  $[\ln \ln]_+ \frac{1}{\epsilon}, c, \ln \frac{1}{\delta} \geq 1$  and  $\epsilon < 1$ , we have  $\frac{D_0 \epsilon (1 + \ln \frac{1}{\delta})}{\sqrt{c\xi [\ln \ln]_+ \frac{1}{\epsilon} \ln \frac{1}{\delta}}} \leq \frac{2D_0}{\sqrt{\xi}}$ .

Since  $[\ln \ln]_+ x \geq 1$  if  $x \geq 1$ , we have  $[\ln \ln]_+ \frac{1}{\epsilon} \leq \frac{1}{\epsilon}$ , and thus

$$\begin{aligned}
\sqrt{[\ln \ln]_+ \left( \frac{c\xi}{\epsilon^2} \ln \frac{1}{\delta} [\ln \ln]_+ \frac{1}{\epsilon} \right)} &= \sqrt{\ln \left[ \max \left\{ e, 2 \ln \frac{1}{\epsilon} + \ln c\xi + \ln \ln \frac{1}{\delta} + \ln [\ln \ln]_+ \frac{1}{\epsilon} \right\} \right]} \\
&\leq \sqrt{\ln \left[ \max \left\{ e, 3 \ln \frac{1}{\epsilon} + \ln c\xi + [\ln \ln]_+ \frac{1}{\delta} \right\} \right]} \\
&\stackrel{(a)}{\leq} \sqrt{\ln \left[ \max \left\{ e, 9 \ln \frac{1}{\epsilon} \ln c\xi [\ln \ln]_+ \frac{1}{\delta} \right\} \right]} \\
&\leq \sqrt{3 + [\ln \ln]_+ \frac{1}{\epsilon} + [\ln \ln]_+ c\xi + \ln [\ln \ln]_+ \frac{1}{\delta}} \\
&\stackrel{(b)}{\leq} \sqrt{3} + \sqrt{[\ln \ln]_+ c\xi} + \sqrt{[\ln \ln]_+ \frac{1}{\epsilon}} + \sqrt{\ln [\ln \ln]_+ \frac{1}{\delta}}
\end{aligned}$$

where (a) follows by  $a + b + c \leq 3abc$  if  $a, b, c \geq 1$ , and (b) follows by  $\sqrt{\sum_i x_i} \leq \sum_i \sqrt{x_i}$  if  $x_i \geq 0$ .

Thus, we have

$$\begin{aligned}
&\frac{1}{\sqrt{N}} \left( D_0 \left( 1 + \ln \frac{1}{\delta} + \sqrt{N[\ln \ln]_+ N} + \sqrt{N \ln \frac{1}{\delta}} \right) - N\epsilon \right) \\
&\leq \sqrt{\ln \frac{1}{\delta}} \left( \frac{2D_0}{\sqrt{\xi}} + D_0 \frac{\sqrt{3} + \sqrt{[\ln \ln]_+ c\xi} + \sqrt{[\ln \ln]_+ \frac{1}{\epsilon}} + \sqrt{\ln [\ln \ln]_+ \frac{1}{\delta}}}{\sqrt{\ln \frac{1}{\delta}}} + D_0 - \sqrt{c\xi [\ln \ln]_+ \frac{1}{\epsilon}} \right) \\
&\stackrel{(c)}{\leq} \sqrt{\ln \frac{1}{\delta}} \left( \frac{2D_0}{\sqrt{\xi}} + D_0 (3 + \sqrt{[\ln \ln]_+ c\xi}) + D_0 - \sqrt{c\xi/2} \right) \\
&\stackrel{(d)}{\leq} -\sqrt{\ln \frac{1}{\delta}}/2
\end{aligned}$$

(c) follows by  $\sqrt{\ln \frac{1}{\delta}} \geq \max \left\{ 1, \sqrt{\ln [\ln \ln]_+ \frac{1}{\delta}} \right\}$ ,  $D_0 \geq 1$ , and  $\sqrt{[\ln \ln]_+ \frac{1}{\epsilon}} \left( \frac{D_0}{\sqrt{\ln \frac{1}{\delta}}} - \sqrt{c\xi} \right) \leq D_0 - \sqrt{c\xi} \leq -\sqrt{c\xi/2}$  if  $c\xi \geq 4D_0^2$ . (d) follows by our choice of  $\xi$ .

Therefore,

$$\begin{aligned}
&\Pr \left( S_N - N\mathbb{E}X_i \leq D_0 \left( 1 + \ln \frac{1}{\delta} + \sqrt{N[\ln \ln]_+ N} + \sqrt{N \ln \frac{1}{\delta}} \right) - N\epsilon \right) \\
&\leq \Pr \left( S_N - N\mathbb{E}X_i \leq -\sqrt{N \ln \frac{1}{\delta}}/2 \right)
\end{aligned}$$

which is at most  $\delta$  by Hoeffding Bound.  $\square$

**Lemma 3.** Suppose  $\{X_i\}_{i=1}^\infty$  is a sequence of i.i.d. random variables such that  $\mathbb{E}X_i \leq 0$ ,  $|X_i| \leq 1$ . Let  $\delta > 0$ . Then with probability at least  $1 - \delta$ , for all  $n$  simultaneously CheckSignificant-Var( $\{X_i\}_{i=1}^n, \delta$ ) in Procedure 2 returns false.

*Proof.* Define  $Y_i = X_i - \mathbb{E}X_i$ . It is easy to check  $\frac{n}{n-1} \left( \sum_{i=1}^n Y_i^2 - \frac{1}{n} (\sum_{i=1}^n Y_i)^2 \right) = \frac{n}{n-1} \left( \sum_{i=1}^n X_i^2 - \frac{1}{n} (\sum_{i=1}^n X_i)^2 \right)$ . The result is immediate from Proposition 2.  $\square$

**Lemma 4.** Suppose  $\{X_i\}_{i=1}^\infty$  is a sequence of i.i.d. random variables such that  $\mathbb{E}X_i > \tau\epsilon$ ,  $|X_i| \leq 1$ ,  $\text{Var}(X_i) \leq 2\epsilon$  where  $0 < \epsilon \leq 1$ ,  $\tau > 0$ . Let  $\delta < 1$ ,  $N = \frac{\xi}{\tau\epsilon} \ln \frac{2}{\delta}$  ( $\xi$  is a constant specified in the proof). Then with probability at least  $1 - \delta$ ,  $\text{CheckSignificant-Var}(\{X_i\}_{i=1}^N, \delta)$  in Procedure 2 returns true.

*Proof.* Let  $Y_i = X_i - \mathbb{E}X_i$ ,  $\eta$  be the constant  $\eta$  in Lemma 14. Set  $\xi = \max(\eta, \frac{16}{\tau} + \frac{8}{3})$ .

$\text{CheckSignificant-Var}(\{X_i\}_{i=1}^N, \delta)$  returns false if and only if  $\sum_{i=1}^N X_i \leq q(N, \text{Var}, \delta)$ .

By applying Lemma 14 to  $X_i$ ,  $\frac{q(N, \text{Var}, \delta)}{N} - \mathbb{E}X_i \leq -\tau\epsilon/2$  with probability at least  $1 - \delta/2$ .

Applying Bernstein's inequality to  $Y_i$ , we have

$$\begin{aligned} \Pr\left(\frac{1}{N} \sum_{i=1}^N Y_i \leq -\tau\epsilon/2\right) &\leq \exp\left(-\frac{N(-\tau\epsilon)^2/4}{4\epsilon + 2\tau\epsilon/3}\right) \\ &= \exp\left(-\frac{\xi \ln \frac{2}{\delta}}{16/\tau + 8/3}\right) \\ &\leq \delta/2 \end{aligned}$$

Thus, by a union bound,

$$\begin{aligned} &\Pr\left(\sum_{i=1}^N X_i \leq q(N, \text{Var}, \delta)\right) \\ &\leq \Pr\left(\frac{q(N, \text{Var}, \delta)}{N} - \mathbb{E}X_i \geq -\tau\epsilon/2\right) \\ &\quad + \Pr\left(\frac{q(N, \text{Var}, \delta)}{N} - \mathbb{E}X_i \leq -\tau\epsilon/2 \text{ and } \frac{1}{N} \sum_{i=1}^N X_i \leq \frac{q(N, \text{Var}, \delta)}{N}\right) \\ &\leq \delta/2 + \Pr\left(\frac{q(N, \text{Var}, \delta)}{N} - \mathbb{E}X_i \leq -\tau\epsilon/2 \text{ and } \frac{1}{N} \sum_{i=1}^N Y_i \leq \frac{q(n, \text{Var}, \delta)}{N} - \mathbb{E}X_i\right) \\ &\leq \delta/2 + \Pr\left(\frac{1}{N} \sum_{i=1}^N Y_i \leq -\tau\epsilon/2\right) \\ &\leq \delta \end{aligned}$$

□

## A.2 The one-dimensional case

*Proof of Theorem 1.* Since  $\hat{\theta} = (L_{\log \frac{1}{2\epsilon}} + R_{\log \frac{1}{2\epsilon}})/2$  and  $R_{\log \frac{1}{2\epsilon}} - L_{\log \frac{1}{2\epsilon}} = 2\epsilon$ ,  $|\hat{\theta} - \theta^*| > \epsilon$  is equivalent to  $\theta^* \notin [L_{\log \frac{1}{2\epsilon}}, R_{\log \frac{1}{2\epsilon}}]$ . We have

$$\begin{aligned} \Pr(|\hat{\theta} - \theta^*| > \epsilon) &= \Pr(\theta^* \notin [L_{\log \frac{1}{2\epsilon}}, R_{\log \frac{1}{2\epsilon}}]) \\ &= \Pr(\exists k : \theta^* \in [L_k, R_k] \text{ and } \theta^* \notin [L_{k+1}, R_{k+1}]) \\ &\leq \sum_{k=0}^{\log \frac{1}{2\epsilon} - 1} \Pr(\theta^* \in [L_k, R_k] \text{ and } \theta^* \notin [L_{k+1}, R_{k+1}]) \end{aligned}$$

For any  $k = 0, \dots, \log \frac{1}{2\epsilon} - 1$ , define  $\mathbb{Q}_k = \left\{ (p, q) : p, q \in \mathbb{Q} \cap [0, 1] \text{ and } q - p = \left(\frac{3}{4}\right)^k \right\}$  where  $\mathbb{Q}$  is the set of rational numbers. Note that  $L_k, R_k \in \mathbb{Q}_k$ , and  $\mathbb{Q}$  is countable. So we have

$$\begin{aligned}
& \Pr(\theta^* \in [L_k, R_k] \text{ and } \theta^* \notin [L_{k+1}, R_{k+1}]) \\
&= \sum_{(p,q) \in \mathbb{Q}_k: p \leq \theta^* \leq q} \Pr(L_k = p, R_k = q \text{ and } \theta^* \notin [L_{k+1}, R_{k+1}]) \\
&= \sum_{(p,q) \in \mathbb{Q}_k: p \leq \theta^* \leq q} \Pr(\theta^* \notin [L_{k+1}, R_{k+1}] | L_k = p, R_k = q) \Pr(L_k = p, R_k = q)
\end{aligned}$$

Define event  $E_{k,p,q}$  to be the event  $L_k = p, R_k = q$ . To show  $\Pr(|\hat{\theta} - \theta^*| > \epsilon) \leq \frac{\delta}{2}$ , it suffices to show  $\Pr(\theta^* \notin [L_{k+1}, R_{k+1}] | E_{k,p,q}) \leq \frac{\delta}{2 \log \frac{1}{2\epsilon}}$  for any  $k = 0, \dots, \log \frac{1}{2\epsilon} - 1$ ,  $(p, q) \in \mathbb{Q}_k$  and  $p \leq \theta^* \leq q$ .

Conditioning on event  $E_{k,p,q}$ , event  $\theta^* \notin [L_{k+1}, R_{k+1}]$  happens only if some calls of CheckSignificant and CheckSignificant-Var between Line 16 and 27 of Algorithm 1 return true incorrectly. In other words, at least one of following events happens for some  $n$ :

- $O_{k,p,q}^{(1)}: \theta^* \in [L_k, U_k]$  and CheckSignificant-Var( $\{A_i^{(u)} - A_i^{(m)}\}_{i=1}^n, \frac{\delta}{4 \log \frac{1}{2\epsilon}}$ ) returns true;
- $O_{k,p,q}^{(2)}: \theta^* \in [V_k, R_k]$  and CheckSignificant-Var( $\{A_i^{(v)} - A_i^{(m)}\}_{i=1}^n, \frac{\delta}{4 \log \frac{1}{2\epsilon}}$ ) returns true;
- $O_{k,p,q}^{(3)}: \theta^* \in [L_k, U_k]$  and CheckSignificant( $\{-B_i^{(u)}\}_{i=1}^n, \frac{\delta}{4 \log \frac{1}{2\epsilon}}$ ) returns true;
- $O_{k,p,q}^{(4)}: \theta^* \in [V_k, R_k]$  and CheckSignificant( $\{B_i^{(v)}\}_{i=1}^n, \frac{\delta}{4 \log \frac{1}{2\epsilon}}$ ) returns true;

Note that since  $[U_k, V_k] \subset [L_{k+1}, R_{k+1}]$  for any  $k$  by our construction, if  $\theta^* \in [U_k, V_k]$  then  $\theta^* \in [L_{k+1}, R_{k+1}]$ . Besides, event  $\theta^* \in [L_k, U_k]$  and event  $\theta^* \in [V_k, R_k]$  are mutually exclusive.

Conditioning on event  $E_{k,p,q}$ , suppose for now  $\theta^* \in [L_k, U_k]$ .

$$\begin{aligned}
& \Pr(O_{k,p,q}^{(1)} | E_{k,p,q}) \\
&= \Pr\left(\exists n : \text{CheckSignificant-Var}\left(\{D_i^{(u,m)}\}_{i=1}^n, \frac{\delta}{4 \log \frac{1}{2\epsilon}}\right) \text{ returns true} \mid \theta^* \in [L_k, U_k], E_{k,p,q}\right)
\end{aligned}$$

On event  $\theta^* \in [L_k, U_k]$  and  $E_{k,p,q}$ , the sequences  $\{A_i^{(u)}\}$  and  $\{A_i^{(m)}\}$  are i.i.d., and  $\mathbb{E}[A_i^{(u)} - A_i^{(m)} \mid \theta^* \in [L_k, U_k], E_{k,p,q}] \leq 0$ . By Lemma 3, the probability above is at most  $\frac{\delta}{4 \log \frac{1}{2\epsilon}}$ .

Likewise,

$$\begin{aligned}
& \Pr(O_{k,p,q}^{(3)} | E_{k,p,q}) \\
&= \Pr\left(\exists n : \text{CheckSignificant}\left(\{-B_i^{(u)}\}_{i=1}^n, \frac{\delta}{4 \log \frac{1}{2\epsilon}}\right) \text{ returns true} \mid \theta^* \in [L_k, U_k], E_{k,p,q}\right)
\end{aligned}$$

On event  $\theta^* \in [L_k, U_k]$  and  $E_{k,p,q}$ , the sequence  $\{B_i^{(u)}\}$  is i.i.d., and  $\mathbb{E}[-B_i^{(u)} \mid \theta^* \in [L_k, U_k], E_{k,p,q}] \leq 0$ . By Lemma 1, the probability above is at most  $\frac{\delta}{4 \log \frac{1}{2\epsilon}}$ .

Thus,  $\Pr(\theta^* \notin [L_{k+1}, R_{k+1}] | E_{k,p,q}) \leq \frac{\delta}{2 \log \frac{1}{2\epsilon}}$  when  $\theta^* \in [L_k, U_k]$ . Similarly, when  $\theta^* \in [V_k, R_k]$ , we can show  $\Pr(\theta^* \notin [L_{k+1}, R_{k+1}] | E_{k,p,q}) \leq \Pr(O_{k,p,q}^{(2)} | E_{k,p,q}) + \Pr(O_{k,p,q}^{(4)} | E_{k,p,q}) \leq \frac{\delta}{2 \log \frac{1}{2\epsilon}}$ .

Therefore,  $\Pr(\theta^* \notin [L_{k+1}, R_{k+1}] \mid E_{k,p,q}) \leq \frac{\delta}{2 \log \frac{1}{2\epsilon}}$ , and thus  $\Pr(|\hat{\theta} - \theta^*| > \epsilon) \leq \delta/2$ .  $\square$

*Proof of Theorem 2.* Define  $T_k$  to be the number of iterations of the loop at Line 6,  $T = \sum_{k=0}^{\log \frac{1}{2\epsilon} - 1} T_k$ . For any numbers  $m_1, m_2, \dots, m_{\log \frac{1}{2\epsilon} - 1}$ , we have:

$$\begin{aligned}
\Pr(T \geq m) &\leq \Pr(|\hat{\theta} - \theta^*| > \epsilon) + \Pr\left(|\hat{\theta} - \theta^*| < \epsilon \text{ and } T \geq \sum_{k=0}^{\log \frac{1}{2\epsilon} - 1} m_k\right) \\
&\leq \frac{\delta}{2} + \Pr\left(T \geq \sum_{k=0}^{\log \frac{1}{2\epsilon} - 1} m_k \text{ and } |\hat{\theta} - \theta^*| < \epsilon\right) \\
&\leq \frac{\delta}{2} + \sum_{k=0}^{\log \frac{1}{2\epsilon} - 1} \Pr(T_k \geq m_k \text{ and } |\hat{\theta} - \theta^*| < \epsilon) \\
&\leq \frac{\delta}{2} + \sum_{k=0}^{\log \frac{1}{2\epsilon} - 1} \Pr(T_k \geq m_k \text{ and } \theta^* \in [L_k, R_k])
\end{aligned} \tag{1}$$

The first and the third inequality follows by union bounds. The second follows by Theorem 1. The last follows since  $|\hat{\theta} - \theta^*| < \epsilon$  is equivalent to  $\theta^* \in [L_{\log \frac{1}{2\epsilon}}, R_{\log \frac{1}{2\epsilon}}]$ , which implies  $\theta^* \in [L_k, R_k]$  for all  $k = 0, \dots, \log \frac{1}{2\epsilon} - 1$ .

We define  $\mathbb{Q}_k$  as in the previous proof. For all  $k = 0, \dots, \log \frac{1}{2\epsilon} - 1$ ,

$$\begin{aligned}
&\Pr(T_k \geq m_k \text{ and } \theta^* \in [L_k, R_k]) \\
&= \sum_{(p,q) \in \mathbb{Q}_k: p \leq \theta^* \leq q} \Pr(T_k \geq m_k, L_k = p, R_k = q) \\
&= \sum_{(p,q) \in \mathbb{Q}_k: p \leq \theta^* \leq q} \Pr(T_k \geq m_k \mid L_k = p, R_k = q) \Pr(L_k = p, R_k = q)
\end{aligned}$$

Thus, in order to prove the query complexity of Algorithm 1 is  $O\left(\sum_{k=0}^{\log \frac{1}{2\epsilon} - 1} m_k\right)$ , it suffices to show that  $\Pr(T_k \geq m_k \mid L_k = p, R_k = q) \leq \frac{\delta}{2 \log \frac{1}{2\epsilon}}$  for any  $k = 0, \dots, \log \frac{1}{2\epsilon} - 1$ ,  $(p, q) \in \mathbb{Q}_k$  and  $p \leq \theta^* \leq q$ .

For each  $k, p, q$ , define event  $E_{k,p,q}$  to be the event  $L_k = p, R_k = q$ . Define  $l_k = q - p = \left(\frac{3}{4}\right)^k$ ,  $N_k$  to be  $\tilde{\Theta}\left(\frac{1}{f(l_k/4)} l_k^{-2\beta}\right)$ . The logarithm factor of  $N_k$  is to be specified later. Define  $S_n^{(u)}$  and  $S_n^{(v)}$  to be the size of array  $B^{(u)}$  and  $B^{(v)}$  before Line 16 respectively.

To show  $\Pr(T_k \geq N_k \mid E_{k,p,q}) \leq \frac{\delta}{2 \log \frac{1}{2\epsilon}}$ , it suffices to show that on event  $E_{k,p,q}$ , with probability at least  $1 - \frac{\delta}{2 \log \frac{1}{2\epsilon}}$ , if  $n = N_k$  then at least one of the two calls to CheckSignificant between Line 22 and Line 27 will return true.

On event  $E_{k,p,q}$ , if  $\theta^* \in [L_k, M_k]$  (note that on event  $E_{k,p,q}$ ,  $L_k$  and  $M_k$  are deterministic), then  $|V_k - \theta^*| \geq \frac{l_k}{4}$ . We will show

$$p_1 := \Pr\left(\text{CheckSignificant}\left(\left\{B_i^{(v)}\right\}_{i=1}^{S_{N_k}^{(v)}}, \frac{\delta}{4 \log \frac{1}{2\epsilon}}\right) \text{ returns false} \mid E_{k,p,q}\right) \leq \frac{\delta}{2 \log \frac{1}{2\epsilon}}$$

To prove this, we will first show that  $S_{N_k}^{(v)}$ , the length of the array  $B^{(v)}$ , is large with high probability, and then apply Lemma 2 to show that CheckSignificant will return true if  $S_{N_k}^{(v)}$  is large.

By definition,  $S_{N_k}^{(v)} = \sum_{i=1}^{N_k} A_i^{(v)}$ . By Condition 2,  $\mathbb{E}[A_i^{(v)} | E_{k,p,q}] = \Pr(Y \neq \perp | X = V_k, E_{k,p,q}) \geq f\left(\frac{l_k}{4}\right)$ .

On event  $E_{k,p,q}$ ,  $\{A_i^{(v)}\}$  is a sequence of i.i.d. random variables. By the multiplicative Chernoff bound,  $\Pr\left(S_{N_k}^{(v)} \leq \frac{1}{2}N_k f\left(\frac{l_k}{4}\right) \mid E_{k,p,q}\right) \leq \exp\left(-N_k f\left(\frac{l_k}{4}\right)/8\right)$ .

Now,

$$p_1 \leq \Pr\left(\text{CheckSignificant}\left(\left\{B_i^{(v)}\right\}_{i=1}^{S_{N_k}^{(v)}}, \frac{\delta}{4 \log \frac{1}{2\epsilon}}\right) \text{ returns false}, S_{N_k}^{(v)} \geq \frac{1}{2}N_k f\left(\frac{l_k}{4}\right) \mid E_{k,p,q}\right) \\ + \Pr\left(S_{N_k}^{(v)} < \frac{1}{2}N_k f\left(\frac{l_k}{4}\right) \mid E_{k,p,q}\right)$$

By Condition 2 and  $|V_k - \theta^*| \geq \frac{l_k}{4}$ ,  $\mathbb{E}[B_i^{(v)} | E_{k,p,q}] \geq C\left(\frac{l_k}{4}\right)^\beta$ . On event  $E_{k,p,q}$ ,  $\{B_i^{(v)}\}$  is a sequence of i.i.d. random variables. Thus, On event  $E_{k,p,q}$ , by Lemma 2, with probability at least  $1 - \frac{\delta}{4 \log \frac{1}{2\epsilon}}$ , CheckSignificant will return true if  $\frac{1}{2}N_k f\left(\frac{l_k}{4}\right) = \Theta\left(\frac{1}{l_k^{2\beta}} \ln \frac{\ln 1/\epsilon}{\delta} [\ln \ln]_+ \frac{1}{l_k^{2\beta}}\right)$ . We have already proved  $\Pr\left(S_{N_k}^{(v)} \leq \frac{1}{2}N_k f\left(\frac{l_k}{4}\right) \mid E_{k,p,q}\right) \leq \exp\left(-N_k f\left(\frac{l_k}{4}\right)/8\right)$ . By setting  $N_k = \Theta\left(\frac{1}{f(l_k/4)} l_k^{-2\beta} \ln \frac{\ln 1/\epsilon}{\delta} [\ln \ln]_+ \frac{1}{l_k^{2\beta}}\right)$ , we can ensure  $p_1$  is at most  $\delta/2 \log \frac{1}{2\epsilon}$ .

Now we have proved on event  $E_{k,p,q}$ , if  $\theta^* \in [L_k, M_k]$ , then

$$\Pr\left(\text{CheckSignificant}\left(\left\{B_i^{(v)}\right\}_{i=1}^{S_{N_k}^{(v)}}, \frac{\delta}{4 \log \frac{1}{2\epsilon}}\right) \text{ returns true} \mid E_{k,p,q}\right) \geq 1 - \frac{\delta}{2 \log \frac{1}{2\epsilon}}$$

Likewise, on event  $E_{k,p,q}$ , if  $\theta^* \in [M_k, R_k]$ , then

$$\Pr\left(\text{CheckSignificant}\left(\left\{-B_i^{(u)}\right\}_{i=1}^{S_{N_k}^{(u)}}, \frac{\delta}{4 \log \frac{1}{2\epsilon}}\right) \text{ returns true} \mid E_{k,p,q}\right) \geq 1 - \frac{\delta}{2 \log \frac{1}{2\epsilon}}$$

Therefore, we have shown  $\Pr(T_k \geq N_k \mid E_{k,p,q}) \leq \frac{\delta}{2 \log \frac{1}{2\epsilon}}$  for any  $k, p, q$ . By (1), with probability at least  $1 - \delta$ , the number of samples queried is at most

$$\sum_{k=0}^{\log \frac{1}{2\epsilon} - 1} O\left(\frac{1}{f\left(\left(\frac{3}{4}\right)^k / 4\right)} \left(\frac{3}{4}\right)^{-2\beta k} \ln \frac{\ln 1/\epsilon}{\delta} [\ln \ln]_+ \left(\frac{3}{4}\right)^{-2\beta k}\right) \\ = O\left(\frac{\epsilon^{-2\beta}}{f(\epsilon/2)} \ln \frac{1}{\epsilon} \left(\ln \frac{1}{\delta} + \ln \ln \frac{1}{\epsilon}\right) [\ln \ln]_+ \frac{1}{\epsilon}\right)$$

□

*Proof of Theorem 3.* For each  $k$  in Algorithm 1 at Line 3, Let  $l_k = R_k - L_k$ . Let  $N_k = \eta \frac{1}{f(l_k/4)} \ln \frac{4 \log \frac{1}{2\epsilon}}{\delta}$ , where  $\eta$  is a constant to be specified later. As with the previous proof, it suffices to show  $\Pr(T_k \geq N_k \mid E_{k,p,q}) \leq \frac{\delta}{2 \log \frac{1}{2\epsilon}}$  where event  $E_{k,p,q}$  is defined to be  $L_k = p, R_k = q, T_k$  is the number of iterations at the loop at Line 6.

On event  $E_{k,p,q}$ , we will show that the loop at Line 6 will terminate after  $n = N_k$  with probability at least  $1 - \frac{\delta}{2 \log \frac{1}{2\epsilon}}$ .

Suppose for now  $\theta^* \in [M_k, R_k]$ . Let  $Z_i = A_i^{(u)} - A_i^{(m)}$ ,  $\zeta = \theta^* - M_k$ . Clearly,  $|Z_i| \leq 1$ . On event  $E_{k,p,q}$ , sequence  $\{Z_i\}$  is i.i.d.. By Condition 3,  $\mathbb{E}[Z_i \mid E_{k,p,q}] = f(\zeta + \frac{l_k}{4}) - f(\zeta) \geq$

$cf(\zeta + \frac{l_k}{4})$  since  $\zeta \leq \frac{2}{3}(\zeta + \frac{l_k}{4})$ .  $\text{Var}[Z_i | E_{k,p,q}] = \text{Var}[A_i^{(u)} | E_{k,p,q}] + \text{Var}[A_i^{(m)} | E_{k,p,q}] \stackrel{(a)}{\leq} \mathbb{E}[A_i^{(u)} | E_{k,p,q}] + \mathbb{E}[A_i^{(m)} | E_{k,p,q}] = f(\zeta + \frac{l_k}{4}) + f(\zeta) \stackrel{(b)}{\leq} 2f(\zeta + \frac{l_k}{4})$  where (a) follows by  $A_i \in \{0, 1\}$  and (b) follows by the monotonicity of  $f$ . Thus, on event  $E_{k,p,q}$ , by Lemma 4, if we set  $\eta$  sufficiently large (independent of  $l_k, \epsilon, \delta$ ), then with probability at least  $1 - \frac{\delta}{4 \log \frac{1}{2\epsilon}}$   $\text{CheckSignificant-Var}(\{Z_i\}_{i=1}^{N_k}, \frac{\delta}{4 \log \frac{1}{2\epsilon}})$  in Procedure 2 returns true.

Similarly, we can show that on event  $E_{k,p,q}$ , if  $\theta^* \in [L_k, M_k]$ , by Lemma 4, with probability at least  $1 - \frac{\delta}{4 \log \frac{1}{2\epsilon}}$ ,  $\text{CheckSignificant-Var}(\{A_i^{(v)} - A_i^{(m)}\}_{i=1}^{N_k}, \frac{\delta}{4 \log \frac{1}{2\epsilon}})$  returns true.

Therefore, the loop at Line 6 will terminate after  $n = N_k$  with probability at least  $1 - \frac{\delta}{4 \log \frac{1}{2\epsilon}}$  on event  $E_{k,p,q}$ . Therefore, with probability at least  $1 - \delta$ , the number of samples queried is at most  $\sum_{k=0}^{\log \frac{1}{2\epsilon} - 1} \frac{1}{f((\frac{3}{4})^k / 4)} \ln \frac{\ln 1/\epsilon}{\delta} = O\left(\frac{1}{f(\epsilon/2)} \ln \frac{1}{\epsilon} \left(\ln \frac{1}{\delta} + \ln \ln \frac{1}{\epsilon}\right)\right)$ .  $\square$

### A.3 The d-dimensional case

To prove the  $d$ -dimensional case, we only need to use a union bound to show that with high probability all calls of Algorithm 1 succeed, and consequently the output boundary  $g$  produced by polynomial interpolation is close to the true underlying boundary due to the smoothness assumption of  $g^*$ .

*Proof of Theorem 8.* For  $q \in \left\{0, 1, \dots, \frac{M}{\gamma} - 1\right\}^{d-1}$ , define the “polynomial interpolation” version of  $g^*$  as

$$g_q^*(\tilde{\mathbf{x}}) = \sum_{l \in I_q \cap \mathcal{L}} g^*(l) Q_{q,l}(\tilde{\mathbf{x}})$$

Recall that we choose  $M = O(\epsilon^{-1/\gamma})$ .

By Theorem 1, each run of Algorithm 1 at the line 3 of Algorithm 3 will return a  $g_l$  such that  $|g_l - g_q^*(l)| \leq \epsilon$  with probability at least  $1 - \delta/2M^{d-1}$ .

$$\begin{aligned} & \|g - g^*\| \\ &= \sum_{q \in \{0, \dots, M/\gamma - 1\}^{d-1}} \|(g_q - g^*) \mathbb{1}\{\tilde{\mathbf{x}} \in I_q\}\| \\ &\leq \sum_{q \in \{0, \dots, M/\gamma - 1\}^{d-1}} \|(g_q - g_q^*) \mathbb{1}\{\tilde{\mathbf{x}} \in I_q\}\| + \|(g_q^* - g^*) \mathbb{1}\{\tilde{\mathbf{x}} \in I_q\}\| \end{aligned}$$

$$\begin{aligned} \|(g_q^* - g^*) \mathbb{1}\{\tilde{\mathbf{x}} \in I_q\}\| &= \int_{I_q} |g_q^*(\tilde{\mathbf{x}}) - g^*(\tilde{\mathbf{x}})| d\tilde{\mathbf{x}} \\ &= O\left(\int_{I_q} M^{-\gamma} d\tilde{\mathbf{x}}\right) \\ &= O(M^{-\gamma-d+1}) \end{aligned}$$

The second equality follows from Lemma 3 of [6] that  $|g_q(\tilde{\mathbf{x}}) - g^*(\tilde{\mathbf{x}})| = O(M^{-\gamma})$  since  $g^*$  is  $\gamma$ -Hölder smooth.

$$\begin{aligned}
& \| (g_q - g_q^*) \mathbb{1}\{\tilde{\mathbf{x}} \in I_q\} \| \\
&= \sum_{l \in I_q \cap \mathcal{L}} |g_l - g_q^*(l)| \|Q_{q,l}\| \\
&\leq \sum_{l \in I_q \cap \mathcal{L}} \epsilon \|Q_q\| \\
&= O(\epsilon M^{-d+1})
\end{aligned}$$

Therefore, overall we have  $\|g - g^*\| \leq O(M^{-\gamma-d+1} + \epsilon M^{-d+1}) \left(\frac{M}{\gamma}\right)^{d-1} = O(\epsilon)$ .  $\square$

*Proof of Theorem 9.* By Theorem 2, each run of Algorithm 1 at the line 3 of Algorithm 3 will make  $\tilde{O}\left(\frac{d}{f(\epsilon/2)}\epsilon^{-2\beta}\right)$  queries with probability at least  $1 - \delta/M^{d-1}$ , thus by a union bound, the total number of queries made is  $\tilde{O}\left(\frac{d}{f(\epsilon/2)}\epsilon^{-2\beta-\frac{d-1}{\gamma}}\right)$  with probability at least  $1 - \delta$ .  $\square$

*Proof of Theorem 10.* The proof is similar to the previous proof.  $\square$

## B Proof of lower bounds

First, we introduce some notations for this section. Given a labeler  $L$  and an active learning algorithm  $\mathcal{A}$ , denote by  $P_{L,\mathcal{A}}^n$  the distribution of  $n$  samples  $\{(X_i, Y_i)\}_{i=1}^n$  where  $Y_i$  is drawn from distribution  $P_L(Y|X_i)$  and  $X_i$  is drawn by the active learning algorithm based solely on the knowledge of  $\{(X_j, Y_j)\}_{j=1}^{i-1}$ . We will drop the subscripts from  $P_{L,\mathcal{A}}^n$  and  $P_{\mathcal{L}}(Y|X)$  when it is clear from the context. For a sequence  $\{X_i\}_{i=1}^\infty$  denote by  $X^n$  the subsequence  $\{X_1, \dots, X_n\}$ .

**Definition 1.** For any distributions  $P, Q$  on a countable support, define KL-divergence as  $d_{\text{KL}}(P, Q) = \sum_x P(x) \ln \frac{P(x)}{Q(x)}$ . For two random variables  $X, Y$ , define the mutual information as  $I(X; Y) = d_{\text{KL}}(P(X, Y) \| P(X)P(Y))$ .

We will use Fano's method shown as below to prove the lower bounds.

**Lemma 5.** Let  $\Theta$  be a class of parameters, and  $\{P_\theta : \theta \in \Theta\}$  be a class of probability distributions indexed by  $\Theta$  over some sample space  $\mathcal{X}$ . Let  $d : \Theta \times \Theta \rightarrow \mathbb{R}$  be a semi-metric. Let  $\mathcal{V} = \{\theta_1, \dots, \theta_M\} \subseteq \Theta$  such that  $\forall i \neq j, d(\theta_i, \theta_j) \geq 2s > 0$ . Let  $\bar{P} = \frac{1}{M} \sum_{\theta \in \mathcal{V}} P_\theta$ . If  $d_{\text{KL}}(P_\theta \| \bar{P}) \leq \delta$  for any  $\theta \in \mathcal{V}$ , then for any algorithm  $\hat{\theta}$  that given a sample  $X$  drawn from  $P_\theta$  outputs  $\hat{\theta}(X) \in \Theta$ , the following inequality holds:

$$\sup_{\theta \in \Theta} P_\theta \left( d(\theta, \hat{\theta}(X)) \geq s \right) \geq 1 - \frac{\delta + \ln 2}{\ln M}$$

*Proof.* For any algorithm  $\hat{\theta}$ , define a test function  $\hat{\Psi} : \mathcal{X} \rightarrow \{1, \dots, M\}$  such that  $\hat{\Psi}(X) = \arg \min_{i \in \{1, \dots, M\}} d(\hat{\theta}(X), \theta_i)$ . We have

$$\sup_{\theta \in \Theta} P_\theta \left( d(\theta, \hat{\theta}(X)) \geq s \right) \geq \max_{\theta \in \mathcal{V}} P_\theta \left( d(\theta, \hat{\theta}(X)) \geq s \right) \geq \max_{i \in \{1, \dots, M\}} P_{\theta_i} \left( \hat{\Psi}(X) \neq i \right)$$

Let  $V$  be a random variable uniformly taking values from  $\mathcal{V}$ , and  $X$  be drawn from  $P_V$ . By Fano's Inequality, for any test function  $\Psi : \mathcal{X} \rightarrow \{1, \dots, M\}$

$$\max_{i \in \{1, \dots, M\}} P_{\theta_i} (\Psi(X) \neq i) \geq 1 - \frac{I(V; X) + \ln 2}{\ln M}$$

The desired result follows by the fact that  $I(V; X) = \frac{1}{M} \sum_{\theta \in \mathcal{V}} d_{\text{KL}}(P_\theta \| \bar{P})$ .  $\square$



### B.1 The one dimensional case

*Proof of Theorem 5.*<sup>2</sup> Without lose of generality, let  $C = C' = 1$  ( $C$  is defined in Condition 2). Let  $\epsilon \leq \frac{1}{4} \min \left\{ \left( \frac{1}{2} \right)^{1/\beta}, \left( \frac{4}{5} \right)^{1/\alpha}, \frac{1}{4} \right\}$ . We will prove the desired result using Lemma 5.

First, we construct  $\mathcal{V}$  and  $P_\theta$ . For any  $k \in \{0, 1, 2, 3\}$ , let  $P_{L_k}(Y | X)$  be the distribution of the labeler  $L_k$ 's response with the ground truth  $\theta_k = k\epsilon$ :

$$\begin{aligned} P_{L_k}(Y = \perp | x) &= 1 - \left| x - \frac{1}{2} - k\epsilon \right|^\alpha \\ P_{L_k}(Y = 0 | x) &= \begin{cases} (x - \frac{1}{2} - k\epsilon)^\alpha \left( 1 - (x - \frac{1}{2} - k\epsilon)^\beta \right) / 2 & x > \frac{1}{2} + k\epsilon \\ (\frac{1}{2} + k\epsilon - x)^\alpha \left( 1 + (\frac{1}{2} + k\epsilon - x)^\beta \right) / 2 & x \leq \frac{1}{2} + k\epsilon \end{cases} \\ P_{L_k}(Y = 1 | x) &= \begin{cases} (x - \frac{1}{2} - k\epsilon)^\alpha \left( 1 + (x - \frac{1}{2} - k\epsilon)^\beta \right) / 2 & x > \frac{1}{2} + k\epsilon \\ (\frac{1}{2} + k\epsilon - x)^\alpha \left( 1 - (\frac{1}{2} + k\epsilon - x)^\beta \right) / 2 & x \leq \frac{1}{2} + k\epsilon \end{cases} \end{aligned}$$

Clearly,  $P_{L_k}$  complies with Conditions 1, 2 and 3.

Define  $P_k^n$  to be the distribution of  $n$  samples  $\{(X_i, Y_i)\}_{i=1}^n$  where  $Y_i$  is drawn from distribution  $P_{L_k}(Y | X_i)$  and  $X_i$  is drawn by the active learning algorithm based solely on the knowledge of  $\{(X_j, Y_j)\}_{j=1}^{i-1}$ .

Define  $\bar{P}_L = \frac{1}{4} \sum_j P_{L_j}$  and  $\bar{P}^n = \frac{1}{4} \sum_j P_k^n$ . We take  $\Theta$  to be  $[0, 1]$ , and  $d(\theta_1, \theta_2) = |\theta_1 - \theta_2|$  in Lemma 5. To use Lemma 5, we need to bound  $d_{\text{KL}}(P_k^n \| \bar{P}^n)$  for  $k \in \{0, 1, 2, 3\}$ .

For any  $k \in \{0, 1, 2, 3\}$ ,

$$\begin{aligned} & d_{\text{KL}}(P_k^n \| \bar{P}^n) \\ &= \mathbb{E}_{P_k^n} \left( \ln \frac{P_k^n(\{(X_i, Y_i)\}_{i=1}^n)}{\bar{P}^n(\{(X_i, Y_i)\}_{i=1}^n)} \right) \\ &= \mathbb{E}_{P_k^n} \left( \ln \frac{P_k^n(X_1) P_k^n(Y_1 | X_1) P_k^n(X_2 | X_1, Y_1) \cdots P_k^n(Y_n | X_1, Y_1, \dots, X_n)}{\bar{P}^n(X_1) \bar{P}^n(Y_1 | X_1) \bar{P}^n(X_2 | X_1, Y_1) \cdots \bar{P}^n(Y_n | X_1, Y_1, \dots, X_n)} \right) \\ &\stackrel{(a)}{=} \mathbb{E}_{P_k^n} \left( \ln \frac{\prod_{i=1}^n P_{L_k}(Y_i | X_i)}{\prod_{i=1}^n \bar{P}_L(Y_i | X_i)} \right) \\ &= \sum_{i=1}^n \mathbb{E}_{P_k^n} \left( \mathbb{E}_{P_k^n} \left( \ln \frac{P_{L_k}(Y_i | X_i)}{\bar{P}_L(Y_i | X_i)} \mid X^n \right) \right) \\ &\leq n \max_{x \in [0, 1]} d_{\text{KL}}(P_{L_k}(Y | x) \| \bar{P}_L(Y | x)) \end{aligned} \tag{2}$$

(a) follows by the fact that  $P_k^n(X_{i+1} | X_1, Y_1, \dots, X_i, Y_i) = \bar{P}^n(X_{i+1} | X_1, Y_1, \dots, X_i, Y_i)$  since  $X_{i+1}$  is drawn by the same active learning algorithm based solely on the knowledge of  $\{(X_j, Y_j)\}_{j=1}^i$  regardless of the labeler's response distribution, and the fact that  $P_k^n(Y_i | X_1, Y_1, \dots, X_i) = P_{L_k}(Y_i | X_i)$  and  $\bar{P}^n(Y_i | X_1, Y_1, \dots, X_i) = \bar{P}_L(Y_i | X_i)$  by definition.

For any  $k \in \{1, 2, 3\}$ ,  $x \in [0, 1]$ ,

$$\bar{P}_L(\cdot | x) \geq \frac{P_{L_0}(\cdot | x) + P_{L_k}(\cdot | x)}{4} \tag{3}$$

For any  $k \in \{0, 1, 2, 3\}$ ,  $x \in [0, 1]$ ,  $y \in \{1, -1, \perp\}$

<sup>2</sup>Actually we can use Le Cam's method to prove this one dimensional case (which only needs to construct 2 distributions instead of 4 here), but this proof can be generalized to the multidimensional case more easily.

$$\begin{aligned}
& (\bar{P}_L(Y = y | x) - P_{L_k}(Y = y | x))^2 \\
&= \left( \sum_j \frac{1}{4} (P_{L_j}(Y = y | x) - P_{L_0}(Y = y | x)) + (P_{L_0}(Y = y | x) - P_{L_k}(Y = y | x)) \right)^2 \\
&\leq \left( \frac{5}{16} \sum_{j>0} (P_{L_j}(Y = y | x) - P_{L_0}(Y = y | x))^2 + 5 (P_{L_0}(Y = y | x) - P_{L_k}(Y = y | x))^2 \right) \\
&\leq 6 \sum_{j>0} (P_{L_j}(Y = y | x) - P_{L_0}(Y = y | x))^2 \tag{4}
\end{aligned}$$

where the first inequality follows by  $\left(\sum_{i=0}^4 a_i\right)^2 \leq 5 \sum_{i=0}^4 a_i^2$  by letting  $a_j = \frac{1}{4} (P_{L_j}(Y = y | x) - P_{L_0}(Y = y | x))$  for  $j = 0, \dots, 3$  and  $a_4 = P_{L_0}(Y = y | x) - P_{L_k}(Y = y | x)$ , and noting that  $a_0 = 0$  under this setting.

Thus,

$$\begin{aligned}
& d_{\text{KL}}(P_{L_k}(Y | x) \| \bar{P}_L(Y | x)) \\
&\leq \sum_y \frac{1}{\bar{P}_L(Y = y | x)} (P_{L_k}(Y = y | x) - \bar{P}_L(Y = y | x))^2 \\
&\leq 24 \sum_{j>0} \sum_y \frac{1}{P_{L_j}(y | x) + P_{L_0}(y | x)} (P_{L_j}(Y = y | x) - P_{L_0}(Y = y | x))^2 \\
&\leq O(\epsilon^\alpha)
\end{aligned}$$

The first inequality follows from Lemma 10. The second inequality follows by (3) and (4). The last inequality follows by applying Lemma 11 to  $P_{L_0}(\cdot | x)$  and  $P_{L_j}(\cdot | x)$  and the assumption  $\alpha \leq 2$ .

Therefore, we have  $d_{\text{KL}}(P_k^n \| \bar{P}_0^n) = nO(\epsilon^\alpha)$ . By setting  $n = \epsilon^{-\alpha}$ , we get  $d_{\text{KL}}(P_k^n \| \bar{P}_0^n) \leq O(1)$ , and thus by Lemma 5,

$$\sup_{\theta} P_{\theta} \left( d(\theta, \hat{\theta}(X)) \geq \Omega(\epsilon) \right) \geq 1 - \frac{O(1) + \ln 2}{\ln 4} = O(1)$$

□

## B.2 The d-dimensional case

Again, we will use Lemma 5 to prove the lower bounds for  $d$ -dimensional cases. We first construct  $\{P_{\theta} : \theta \in \Theta\}$  using a similar idea with [6], and then use Lemma 12 to select a subset  $\tilde{\Theta} \subset \Theta$  to apply Lemma 5.

*Proof of Theorem 6.* Again, without lose of generality, let  $C = 1$ . Recall that for  $\mathbf{x} = (x_1, \dots, x_d) \in \mathbb{R}^d$ , we have defined  $\tilde{\mathbf{x}}$  to be  $(x_1, \dots, x_{d-1})$ . Define  $m = (\frac{1}{\epsilon})^{1/\gamma}$ .  $\mathcal{L} = \{0, \frac{1}{m}, \dots, \frac{m-1}{m}\}^{d-1}$ ,  $h(\tilde{\mathbf{x}}) = \prod_{i=1}^{d-1} \exp\left(-\frac{1}{1-4x_i^2}\right) \mathbb{1}\{|x_i| < \frac{1}{2}\}$ ,  $\phi_l(\tilde{\mathbf{x}}) = Km^{-\gamma}h(m(\tilde{\mathbf{x}}-l)-\frac{1}{2})$  where  $l \in \mathcal{L}$ . It is easy to check  $\phi_l(\tilde{\mathbf{x}})$  is  $(K, \gamma)$ -Hölder smooth and has bounded support  $[l_1, l_1 + \frac{1}{m}] \times \dots \times [l_{d-1}, l_{d-1} + \frac{1}{m}]$ , which implies that for different  $l_1, l_2 \in \mathcal{L}$ , the support of  $\phi_{l_1}$  and  $\phi_{l_2}$  do not intersect.

Let  $\Omega = \{0, 1\}^{m^{d-1}}$ . For any  $\omega \in \Omega$ , define  $g_{\omega}(\tilde{\mathbf{x}}) = \sum_{l \in \mathcal{L}} \omega_l \phi_l(\tilde{\mathbf{x}})$ . For each  $\omega \in \Omega$ , define the conditional distribution of labeler  $L_{\omega}$ 's response as follows:

For  $x_d \leq A$ ,  $P_{L_{\omega}}(y = \perp | \mathbf{x}) = 1 - f(A)$ ,  $P_{L_{\omega}}(y \neq \perp | \mathbf{x}, y \neq \perp) = \frac{1}{2} \left(1 - |x_d - g_{\omega}(\tilde{\mathbf{x}})|^{\beta}\right)$ ;

For  $x_d \geq A$ ,  $P_{L_\omega}(y = \perp | \mathbf{x}) = 1 - f(x_d)$ ,  $P_{L_\omega}(y \neq \mathbb{I}(x_d > g_\omega(\tilde{\mathbf{x}})) | \mathbf{x}, y \neq \perp) = \frac{1}{2} (1 - x_d^\beta)$ .

Here,  $A = c \max \phi(\tilde{\mathbf{x}}) = c' \epsilon$  for some constants  $c, c'$ .

It can be easily verified that  $P_{L_\omega}$  satisfies Conditions 1 and 2. Note that  $g_\omega(\tilde{\mathbf{x}})$  can be seen as the underlying decision boundary for labeler  $P_{L_\omega}$ .

Define  $P_\omega^n$  to be the distribution of  $n$  samples  $\{(X_i, Y_i)\}_{i=1}^n$  where  $Y_i$  is drawn from distribution  $P_{L_\omega}(Y | X_i)$  and  $X_i$  is drawn by the active learning algorithm based solely on the knowledge of  $\{(X_j, Y_j)\}_{j=1}^{i-1}$ .

By Lemma 12, when  $\epsilon$  is small enough so that  $m^{d-1}$  is large enough, there is a subset  $\{\omega^{(1)}, \dots, \omega^{(M)}\} \subset \Omega$  such that  $\|\omega^{(i)} - \omega^{(j)}\|_0 \geq m^{d-1}/12$  for any  $0 \leq i < j \leq M$  and  $M \geq 2^{m^{d-1}/48}$ . Define  $P_i^n = P_{\omega^{(i)}}^n$ ,  $\bar{P}^n = \frac{1}{M} \sum_{i=1}^M P_i^n$ .

Next, we will apply Lemma 5 to  $\{\omega^{(1)}, \dots, \omega^{(M)}\}$  with  $d(\omega^{(i)}, \omega^{(j)}) = \|g_{\omega^{(i)}} - g_{\omega^{(j)}}\|$ . We will lower-bound  $d(\omega^{(i)}, \omega^{(j)})$  and upper-bound  $d_{\text{KL}}(P_i^n \| \bar{P}^n)$ .

For any  $1 \leq i < j \leq M$ ,

$$\begin{aligned} & \|g_{\omega^{(i)}} - g_{\omega^{(j)}}\| \\ &= \sum_{l \in \{1, \dots, m\}^{d-1}} \left| \omega_l^{(i)} - \omega_l^{(j)} \right| K m^{-\gamma-(d-1)} \|h\| \\ &\geq m^{d-1}/12 * K m^{-\gamma-(d-1)} \|h\| \\ &= K m^{-\gamma} \|h\| / 12 \\ &= \Theta(\epsilon) \end{aligned}$$

By the convexity of KL-divergence,  $d_{\text{KL}}(P_i^n \| \bar{P}^n) \leq \frac{1}{M} \sum_{j=1}^M d_{\text{KL}}(P_i^n \| P_j^n)$ , so it suffices to upper-bound  $d_{\text{KL}}(P_i^n \| P_j^n)$  for any  $i, j$ .

For any  $1 < i, j \leq M$ ,

$$\begin{aligned} & d_{\text{KL}}(P_i^n \| P_j^n) \\ &\leq n \max_{\mathbf{x} \in [0,1]^d} d_{\text{KL}}(P_{L_{\omega^{(i)}}}^n(Y | \mathbf{x}) \| P_{L_{\omega^{(j)}}}^n(Y | \mathbf{x})) \\ &= n \max_{\mathbf{x} \in [0,1]^d} P_{L_{\omega^{(i)}}}^n(Y \neq \perp | \mathbf{x}) d_{\text{KL}}(P_{L_{\omega^{(i)}}}^n(Y | \mathbf{x}, Y \neq \perp) \| P_{L_{\omega^{(j)}}}^n(Y | \mathbf{x}, Y \neq \perp)) \end{aligned}$$

The inequality follows as (2) in the proof of Theorem 5. The equality follows since  $P_\omega(y = \perp | \mathbf{x})$  is the same for all  $\omega \in \Omega$ .

If  $x_d \geq A$ , then  $P_{L_{\omega^{(i)}}}^n(Y | \mathbf{x}, Y \neq \perp) = P_{L_{\omega^{(j)}}}^n(Y | \mathbf{x}, Y \neq \perp)$ , so  $d_{\text{KL}}(P_{L_{\omega^{(i)}}}^n(Y | \mathbf{x}, Y \neq \perp) \| P_{L_{\omega^{(j)}}}^n(Y | \mathbf{x}, Y \neq \perp)) = 0$ . If  $x_d < A$ , then  $P_{L_{\omega^{(i)}}}^n(Y \neq \perp | \mathbf{x}) = f(A)$ . Therefore,

$$d_{\text{KL}}(P_i^n \| P_j^n) \leq n f(A) \max_{\mathbf{x} \in [0,1]^d} d_{\text{KL}}(P_{L_{\omega^{(i)}}}^n(Y | \mathbf{x}, Y \neq \perp) \| P_{L_{\omega^{(j)}}}^n(Y | \mathbf{x}, Y \neq \perp))$$

Apply Lemma 10 to  $P_{L_{\omega^{(i)}}}^n(Y | \mathbf{x}, Y \neq \perp)$  and  $P_{L_{\omega^{(j)}}}^n(Y | \mathbf{x}, Y \neq \perp)$ , and noting they are bounded above by a constant, we have  $\max_{\mathbf{x} \in [0,1]^d} d_{\text{KL}}(P_{L_{\omega^{(i)}}}^n(Y | \mathbf{x}, Y \neq \perp) \| P_{L_{\omega^{(j)}}}^n(Y | \mathbf{x}, Y \neq \perp)) = O(A^{2\beta})$ . Thus,

$$d_{\text{KL}}(P_i^n \| P_j^n) \leq n f(A) O(A^{2\beta}) = n f(c' \epsilon) O(\epsilon^{2\beta})$$

By setting  $n = \frac{1}{f(c' \epsilon)} \epsilon^{-2\beta - \frac{d-1}{\gamma}}$ , we get  $d_{\text{KL}}(P_i^n \| P_j^n) \leq O(\epsilon^{-\frac{d-1}{\gamma}})$ . The desired results follows by Lemma 5.  $\square$

The proof of Theorem 7 follows the same structure.

*Proof of Theorem 7.* As in the proof of Theorem 6, let  $C = C' = 1$ , and define  $m = (\frac{1}{\epsilon})^{1/\gamma}$ .  $\mathcal{L} = \{0, \frac{1}{m}, \dots, \frac{m-1}{m}\}^{d-1}$ ,  $h(\tilde{\mathbf{x}}) = \prod_{i=1}^{d-1} \exp\left(-\frac{1}{1-4x_i^2}\right) \mathbb{1}\{|x_i| < \frac{1}{2}\}$ ,  $\phi_l(\tilde{\mathbf{x}}) = Km^{-\gamma}h(m(\tilde{\mathbf{x}} - l) - \frac{1}{2})$  where  $l \in \mathcal{L}$ . Let  $\Omega = \{0, 1\}^{m^{d-1}}$ . For any  $\omega \in \Omega$ , define  $g_\omega(\tilde{\mathbf{x}}) = \frac{1}{2} + \sum_{l \in \mathcal{L}} \omega_l \phi_l(\tilde{\mathbf{x}})$ , which can be seen as a decision boundary.  $A = \max \phi(\tilde{\mathbf{x}}) = c'\epsilon$  for some constants  $c'$ .

Let  $g_+(\tilde{\mathbf{x}}) = g_{(1,1,\dots,1)}(\tilde{\mathbf{x}}) = \sum_{l \in \mathcal{L}} \phi_l(\tilde{\mathbf{x}})$ ,  $g_-(\tilde{\mathbf{x}}) = g_{(0,0,\dots,0)}(\tilde{\mathbf{x}}) = 0$ . In other words,  $g_+$  is the “highest” boundary, and  $g_-$  is the “lowest” boundary.

For each  $\omega \in \Omega$ , define the conditional distribution of labeler  $L_\omega$ ’s response as follows:

$$P_{L_\omega}(y = \pm | \mathbf{x}) = 1 - |x_d - g_\omega(\tilde{\mathbf{x}})|^\alpha$$

$$P_{L_\omega}(y \neq \mathbb{I}(x_d > g_\omega(\tilde{\mathbf{x}})) | \mathbf{x}, y \neq \pm) = \frac{1}{2} \left(1 - |x_d - g_\omega(\tilde{\mathbf{x}})|^\beta\right)$$

It can be easily verified that  $P_{L_\omega}$  satisfies Conditions 1, 2, and 3.

Let  $P_+(\cdot | \mathbf{x}) = P_{L_{(1,1,\dots,1)}}(\cdot | \mathbf{x})$ ,  $P_-(\cdot | \mathbf{x}) = P_{L_{(0,0,\dots,0)}}(\cdot | \mathbf{x})$ . By the construction of  $g$ , for any  $\mathbf{x} \in [0, 1]^d$ , any  $\omega \in \Omega$ ,  $P_{L_\omega}(\cdot | \mathbf{x})$  equals either  $P_+(\cdot | \mathbf{x})$  or  $P_-(\cdot | \mathbf{x})$ .

Define  $P_\omega^n$  to be the distribution of  $n$  samples  $\{(X_i, Y_i)\}_{i=1}^n$  where  $Y_i$  is drawn from distribution  $P_{L_\omega}(Y | X_i)$  and  $X_i$  is drawn by the active learning algorithm based solely on the knowledge of  $\{(X_j, Y_j)\}_{j=1}^{i-1}$ .

By Lemma 12, when  $\epsilon$  is small enough so that  $m^{d-1}$  is large enough, there is a subset  $\Omega' = \{\omega^{(1)}, \dots, \omega^{(M)}\} \subset \Omega$  such that (i) (well-separated)  $\|\omega^{(i)} - \omega^{(j)}\|_0 \geq m^{d-1}/12$  for any  $0 \leq i < j \leq M$ ,  $M \geq 2^{m^{d-1}/48}$ ; and (ii) (well-balanced) for any  $j = 1, \dots, m^{d-1}$ ,  $\frac{1}{24} \leq \frac{1}{M} \sum_{i=1}^M \omega_j^{(i)} \leq \frac{3}{24}$ .

Define  $P_i^n = P_{\omega^{(i)}}^n$ ,  $\bar{P}^n = \frac{1}{M} \sum_{i=1}^M P_i^n$ . Define  $P_{L_i} = P_{L_{\omega^{(i)}}}$ ,  $\bar{P}_L = \frac{1}{M} \sum_{i=1}^M P_{L_i}$ . By the well-balanced property, for any  $\mathbf{x} \in [0, 1]^d$ ,  $\bar{P}_L(\cdot | \mathbf{x})$  is between  $\frac{1}{24}P_+(\cdot | \mathbf{x}) + \frac{23}{24}P_-(\cdot | \mathbf{x})$  and  $\frac{3}{24}P_+(\cdot | \mathbf{x}) + \frac{21}{24}P_-(\cdot | \mathbf{x})$ . Therefore

$$\bar{P}_L(\cdot | \mathbf{x}) \geq \frac{1}{24} (P_+(\cdot | \mathbf{x}) + P_-(\cdot | \mathbf{x})) \quad (5)$$

Moreover, since  $P_{L_i}(\cdot | \mathbf{x})$  can only take  $P_+(\cdot | \mathbf{x})$  or  $P_-(\cdot | \mathbf{x})$  for any  $\mathbf{x}$ ,

$$|P_{L_i}(\cdot | \mathbf{x}) - \bar{P}_L(\cdot | \mathbf{x})| \leq |P_+(\cdot | \mathbf{x}) - P_-(\cdot | \mathbf{x})| \quad (6)$$

Next, we will apply Lemma 5 to  $\{\omega^{(1)}, \dots, \omega^{(M)}\}$  with  $d(\omega^{(i)}, \omega^{(j)}) = \|g_{\omega^{(i)}} - g_{\omega^{(j)}}\|$ . We already know from the proof of Theorem 6  $\|g_{\omega^{(i)}} - g_{\omega^{(j)}}\| = \Omega(\epsilon)$ .

For any  $0 < i \leq M$ ,  $d_{\text{KL}}(P_i^n \| \bar{P}_0^n) \leq n \max_{\mathbf{x} \in [0, 1]^d} d_{\text{KL}}(P_{L_i}(Y | \mathbf{x}) \| \bar{P}_L(Y | \mathbf{x}))$ . For any  $\mathbf{x} \in [0, 1]^d$ ,

$$\begin{aligned} & d_{\text{KL}}(P_{L_i}(Y | \mathbf{x}) \| \bar{P}_L(Y | \mathbf{x})) \\ & \leq \sum_y \frac{1}{\bar{P}_L(Y = y | \mathbf{x})} (P_{L_i}(Y = y | \mathbf{x}) - \bar{P}_L(Y = y | \mathbf{x}))^2 \\ & \leq \sum_y \frac{24}{P_+(y | \mathbf{x}) + P_-(y | \mathbf{x})} (P_+(Y = y | \mathbf{x}) - P_-(Y = y | \mathbf{x}))^2 \\ & \leq O(A^\alpha) \end{aligned}$$

The first inequality follows from Lemma 10. The second inequality follows by (5) and (6). The last inequality follows by applying Lemma 11 to  $P_+(\cdot | \mathbf{x})$  and  $P_-(\cdot | \mathbf{x})$ , setting the  $\epsilon$  in Lemma 11 to be  $g_\omega(\tilde{\mathbf{x}})$ , and using  $g_\omega(\tilde{\mathbf{x}}) \leq A$  and the assumption  $\alpha \leq 2$ .

Therefore, we have

$$d_{\text{KL}}(P_i^n \parallel P_0^n) \leq nO(A^\alpha) = nO(\epsilon^\alpha)$$

By setting  $n = \epsilon^{-\alpha - \frac{d-1}{\gamma}}$ , we get  $d_{\text{KL}}(P_i^n \parallel P_0^n) \leq O\left(\epsilon^{-\frac{d-1}{\gamma}}\right)$ . Thus by Lemma 5,

$$\sup_{\theta} P_{\theta} \left( d(\theta, \hat{\theta}(X)) \geq \Omega(\epsilon) \right) \geq 1 - \frac{O\left(\epsilon^{-\frac{d-1}{\gamma}}\right) + \ln 2}{\epsilon^{-\frac{d-1}{\gamma}}/48} = O(1)$$

, from which the desired result follows.  $\square$

## C Technical lemmas

### C.1 Concentration bounds

In this subsection, we define  $Y_1, Y_2, \dots$  to be a sequence of i.i.d. random variables. Assume  $Y_1 \in [-2, 2]$ ,  $\mathbb{E}Y_1 = 0$ ,  $\text{Var}(Y_1) = \sigma^2 \leq 4$ . Define  $V_n = \frac{n}{n-1} \left( \sum_{i=1}^n Y_i^2 - \frac{1}{n} \left( \sum_{i=1}^n Y_i \right)^2 \right)$ . It is easy to check  $\mathbb{E}V_n = n\sigma^2$ .

We need following two results from [21]

**Lemma 6.** ([21], Theorem 2) *Take any  $0 < \delta < 1$ . Then there is an absolute constant  $D_0$  such that with probability at least  $1 - \delta$ , for all  $n$  simultaneously,*

$$\left| \sum_{i=1}^n Y_i \right| \leq D_0 \left( 1 + \ln \frac{1}{\delta} + \sqrt{n\sigma^2 [\ln \ln]_+ (n\sigma^2) + n\sigma^2 \ln \frac{1}{\delta}} \right)$$

**Lemma 7.** ([21], Lemma 3) *Take any  $0 < \delta < 1$ . Then there is an absolute constant  $K_0$  such that with probability at least  $1 - \delta$ , for all  $n$  simultaneously,*

$$n\sigma^2 \leq K_0 \left( 1 + \ln \frac{1}{\delta} + \sum_{i=1}^n Y_i^2 \right)$$

We note that Proposition 1 is immediate from Lemma 6 since  $\text{Var}(Y_i) \leq 4$ .

**Lemma 8.** *Take any  $0 < \delta < 1$ . Then there is an absolute constant  $K_3$  such that with probability at least  $1 - \delta$ , for all  $n \geq \ln \frac{1}{\delta}$  simultaneously,*

$$n\sigma^2 \leq K_3 \left( 1 + \ln \frac{1}{\delta} + V_n \right)$$

*Proof.* By Lemma 7, with probability at least  $1 - \delta/2$ , for all  $n$ ,

$$n\sigma^2 \leq K_0 \left( \sum_{i=1}^n Y_i^2 + \ln \frac{2}{\delta} + 1 \right) = K_0 \left( \frac{n-1}{n} V_n + \frac{1}{n} \left( \sum_{i=1}^n Y_i \right)^2 + \ln \frac{2}{\delta} + 1 \right)$$

By Lemma 6, with probability at least  $1 - \delta/2$ , for all  $n$ ,

$$\begin{aligned}
\frac{1}{n} \left( \sum_{i=1}^n Y_i \right)^2 &< \frac{1}{n} \left( D_0 \left( 1 + \ln \frac{2}{\delta} + \sqrt{n\sigma^2 [\ln \ln]_+ (n\sigma^2) + n\sigma^2 \ln \frac{2}{\delta}} \right) \right)^2 \\
&= \frac{D_0^2}{n} \left( 1 + \ln \frac{2}{\delta} \right)^2 + D_0^2 \sigma^2 [\ln \ln]_+ (n\sigma^2) + D_0^2 \sigma^2 \ln \frac{2}{\delta} \\
&\quad + 2D_0^2 \left( 1 + \ln \frac{2}{\delta} \right) \sqrt{\frac{\sigma^2 [\ln \ln]_+ (n\sigma^2) + \sigma^2 \ln \frac{2}{\delta}}{n}} \\
&\leq K_1 \left( 1 + \ln \frac{1}{\delta} + [\ln \ln]_+ (n\sigma^2) \right)
\end{aligned}$$

for some absolute constant  $K_1$ . The last inequality follows by  $n \geq \ln \frac{1}{\delta}$ .

Thus, by a union bound, with probability at least  $1 - \delta$ , for all  $n$ ,  $n\sigma^2 \leq K_0 V_n + K_0(K_1 + 2) \ln \frac{1}{\delta} + K_0 K_1 [\ln \ln]_+ (n\sigma^2) + K_0(K_1 + 3)$ .

Let  $K_2 > 0$  be an absolute constant such that  $\forall x \geq K_2$ ,  $K_0 K_1 [\ln \ln]_+ x \leq \frac{x}{2}$ .

Now if  $n\sigma^2 \geq K_2$ , then  $n\sigma^2 \leq K_0 V_n + K_0(K_1 + 2) \ln \frac{1}{\delta} + \frac{n\sigma^2}{2} + K_0(K_1 + 3)$ , and thus

$$n\sigma^2 \leq 2K_0 V_n + 2K_0(K_1 + 2) \ln \frac{1}{\delta} + 2K_0(K_1 + 3) + K_2 \quad (7)$$

If  $n\sigma^2 \leq K_2$ , clearly (7) holds. This concludes the proof.  $\square$

We note that Proposition 2 is immediate by applying above lemma to Lemma 6.

**Lemma 9.** *Take any  $\delta, n > 0$ . Then with probability at least  $1 - \delta$ ,*

$$V_n \leq 4n\sigma^2 + 8 \ln \frac{1}{\delta}$$

*Proof.* Applying Bernstein's Inequality to  $Y_i^2$ , and noting that  $\text{Var}(Y_i^2) \leq 4\sigma^2$  since  $|Y_i| \leq 2$ , we have with probability at least  $1 - \delta$ ,

$$\begin{aligned}
\sum_{i=1}^n Y_i^2 &\leq \frac{4}{3} \ln \frac{1}{\delta} + n\sigma^2 + \sqrt{8n\sigma^2 \ln \frac{1}{\delta}} \\
&\leq 4 \ln \frac{1}{\delta} + 2n\sigma^2
\end{aligned}$$

The last inequality follows by the fact that  $\sqrt{4ab} \leq a + b$ .

The desired result follows by noting that  $V_n = \frac{n}{n-1} \left( \sum_{i=1}^n Y_i^2 - \frac{1}{n} \left( \sum_{i=1}^n Y_i \right)^2 \right) \leq 2 \sum_{i=1}^n Y_i^2$ .  $\square$

## C.2 Bounds of distances among probability distributions

**Lemma 10.** *If  $P, Q$  are two probability distributions on a countable support  $\mathcal{X}$ , then*

$$d_{\text{KL}}(P \parallel Q) \leq \sum_x \frac{(P(x) - Q(x))^2}{Q(x)}$$

*Proof.*

$$\begin{aligned}
d_{\text{KL}}(P \parallel Q) &= \sum_x P(x) \ln \frac{P(x)}{Q(x)} \\
&\leq \sum_x P(x) \left( \frac{P(x)}{Q(x)} - 1 \right) \\
&= \sum_x \frac{(P(x) - Q(x))^2}{Q(x)}
\end{aligned}$$

The first inequality follows by  $\ln x \leq x - 1$ . The second equality follows by  $\sum_x P(x) \left( \frac{P(x)}{Q(x)} - 1 \right) = \sum_x \left( \frac{P^2(x) - P(x)Q(x)}{Q(x)} - P(x) + Q(x) \right) = \sum_x \frac{(P(x) - Q(x))^2}{Q(x)}$ .  $\square$

Define

$$\begin{aligned}
P_0(Y = \perp | x) &= 1 - \left| x - \frac{1}{2} \right|^\alpha \\
P_0(Y = 0 | x) &= \begin{cases} \left( x - \frac{1}{2} \right)^\alpha \left( 1 - \left( x - \frac{1}{2} \right)^\beta \right) / 2 & x > \frac{1}{2} \\ \left( \frac{1}{2} - x \right)^\alpha \left( 1 + \left( \frac{1}{2} - x \right)^\beta \right) / 2 & x \leq \frac{1}{2} \end{cases} \\
P_0(Y = 1 | x) &= \begin{cases} \left( x - \frac{1}{2} \right)^\alpha \left( 1 + \left( x - \frac{1}{2} \right)^\beta \right) / 2 & x > \frac{1}{2} \\ \left( \frac{1}{2} - x \right)^\alpha \left( 1 - \left( \frac{1}{2} - x \right)^\beta \right) / 2 & x \leq \frac{1}{2} \end{cases}
\end{aligned}$$

and

$$\begin{aligned}
P_1(Y = \perp | x) &= 1 - \left| x - \epsilon - \frac{1}{2} \right|^\alpha \\
P_1(Y = 0 | x) &= \begin{cases} \left( x - \epsilon - \frac{1}{2} \right)^\alpha \left( 1 - \left( x - \epsilon - \frac{1}{2} \right)^\beta \right) / 2 & x > \epsilon + \frac{1}{2} \\ \left( \epsilon + \frac{1}{2} - x \right)^\alpha \left( 1 + \left( \epsilon + \frac{1}{2} - x \right)^\beta \right) / 2 & x \leq \epsilon + \frac{1}{2} \end{cases} \\
P_1(Y = 1 | x) &= \begin{cases} \left( x - \epsilon - \frac{1}{2} \right)^\alpha \left( 1 + \left( x - \epsilon - \frac{1}{2} \right)^\beta \right) / 2 & x > \epsilon + \frac{1}{2} \\ \left( \epsilon + \frac{1}{2} - x \right)^\alpha \left( 1 - \left( \epsilon + \frac{1}{2} - x \right)^\beta \right) / 2 & x \leq \epsilon + \frac{1}{2} \end{cases}
\end{aligned}$$

**Lemma 11.** *Let  $P_0, P_1$  be the distributions defined above. If  $x \in [0, 1]$ ,  $\epsilon \leq \min \left\{ \left( \frac{1}{2} \right)^{1/\beta}, \left( \frac{4}{5} \right)^{1/\alpha}, \frac{1}{4} \right\}$ , then*

$$\sum_y \frac{(P_0(Y = y|x) - P_1(Y = y|x))^2}{P_0(Y = y|x) + P_1(Y = y|x)} = O(\epsilon^\alpha + \epsilon^2) \quad (8)$$

*Proof.* By symmetry, it suffices to show for  $0 \leq x \leq \frac{1+\epsilon}{2}$ . Let  $t = \frac{1}{2} + \epsilon - x$ .

We first show (8) holds for  $\frac{\epsilon}{2} \leq t \leq \epsilon$  (i.e.  $\frac{1}{2} \leq x \leq \frac{1+\epsilon}{2}$ ).

We claim  $\min_y (P_0(Y = y|X = t) + P_1(Y = y|X = t)) \geq \frac{1}{2} \left( \frac{\epsilon}{2} \right)^\alpha$ . This is because:

- $P_0(Y = \perp | X = t) + P_1(Y = \perp | X = t) = 1 - (\epsilon - t)^\alpha + 1 - t^\alpha \geq 2 - 2\epsilon^\alpha \geq \frac{1}{2} \left( \frac{\epsilon}{2} \right)^\alpha$   
where the last inequality follows by  $\epsilon \leq \left( \frac{4}{5} \right)^{1/\alpha}$ ;
- $2(P_0(Y = 0|X = t) + P_1(Y = 0|X = t)) = (\epsilon - t)^\alpha \left( 1 - (\epsilon - t)^\beta \right) + t^\alpha (1 + t^\beta) \geq t^\alpha (1 + t^\beta) \geq \left( \frac{\epsilon}{2} \right)^\alpha$ . Therefore,  $P_0(Y = 0|X = t) + P_1(Y = 0|X = t) \geq \frac{1}{2} \left( \frac{\epsilon}{2} \right)^\alpha$ .

- Similarly,  $P_0(Y = 1|X = t) + P_1(Y = 1|X = t) \geq \frac{1}{2} \left(\frac{\epsilon}{2}\right)^\alpha$ .

Besides,

$$\begin{aligned}
& \sum_y (P_0(Y = y|X = t) - P_1(Y = y|X = t))^2 \\
&= (t^\alpha - (\epsilon - t)^\alpha)^2 + \frac{1}{4} \left( t^\alpha (1 - t^\beta) - (\epsilon - t)^\alpha (1 + (\epsilon - t)^\beta) \right)^2 \\
&\quad + \frac{1}{4} \left( t^\alpha (1 + t^\beta) - (\epsilon - t)^\alpha (1 - (\epsilon - t)^\beta) \right)^2 \\
&= (t^\alpha - (\epsilon - t)^\alpha)^2 + \frac{1}{4} \left( t^\alpha - (\epsilon - t)^\alpha - t^{\alpha+\beta} - (\epsilon - t)^{\alpha+\beta} \right)^2 \\
&\quad + \frac{1}{4} \left( t^\alpha - (\epsilon - t)^\alpha + t^{\alpha+\beta} + (\epsilon - t)^{\alpha+\beta} \right)^2 \\
&\stackrel{(a)}{\leq} (t^\alpha - (\epsilon - t)^\alpha)^2 + \frac{1}{2} (t^\alpha - (\epsilon - t)^\alpha)^2 + \frac{1}{2} \left( t^{\alpha+\beta} + (\epsilon - t)^{\alpha+\beta} \right)^2 \\
&\quad + \frac{1}{2} (t^\alpha - (\epsilon - t)^\alpha)^2 + \frac{1}{2} \left( t^{\alpha+\beta} + (\epsilon - t)^{\alpha+\beta} \right)^2 \\
&= 2(t^\alpha - (\epsilon - t)^\alpha)^2 + \left( t^{\alpha+\beta} + (\epsilon - t)^{\alpha+\beta} \right)^2 \\
&\leq 2\epsilon^{2\alpha} + 4\epsilon^{2\alpha+2\beta} \\
&\leq 6\epsilon^{2\alpha}
\end{aligned}$$

where (a) follows by the inequality  $(a + b)^2 \leq 2a^2 + 2b^2$  for any  $a, b$ .

Therefore, we get  $\sum_y \frac{(P_0(Y=y|x) - P_1(Y=y|x))^2}{P_0(Y=y|x) + P_1(Y=y|x)} \leq \frac{\sum_y (P_0(Y=y|x) - P_1(Y=y|x))^2}{\min_y (P_0(Y=y|x) + P_1(Y=y|x))} \leq 12 * 2^\alpha \epsilon^\alpha$  when  $\frac{1}{2} \leq x \leq \frac{1+\epsilon}{2}$ .

Next, We show (8) holds for  $\epsilon \leq t \leq \frac{1}{2} + \epsilon$  (i.e.  $0 \leq x \leq \frac{1}{2}$ ). We will show  $\frac{(P_0(Y=y|x) - P_1(Y=y|x))^2}{P_0(Y=y|x) + P_1(Y=y|x)} = O(\epsilon^\alpha + \epsilon^2)$  for  $Y = \perp, 1, 0$ .

For  $Y = \perp$ , for the denominator,

$$P_0(Y = \perp | X = t) + P_1(Y = \perp | X = t) = 2 - t^\alpha - (t - \epsilon)^\alpha \geq 2 - \left(\frac{3}{4}\right)^\alpha - \left(\frac{1}{2}\right)^\alpha$$

For the numerator,

$$(P_0(Y = \perp | X = t) - P_1(Y = \perp | X = t))^2 = (t^\alpha - (t - \epsilon)^\alpha)^2 = t^{2\alpha} \left(1 - \left(1 - \frac{\epsilon}{t}\right)^\alpha\right)^2$$

By Lemma 13, if  $\alpha \geq 1$ ,  $t^{2\alpha} \left(1 - \left(1 - \frac{\epsilon}{t}\right)^\alpha\right)^2 \leq t^{2\alpha} \left(\alpha \frac{\epsilon}{t}\right)^2 = t^{2\alpha-2} (\alpha\epsilon)^2 = O(\epsilon^2)$ . If  $0 \leq \alpha \leq 1$ ,  $t^{2\alpha} \left(1 - \left(1 - \frac{\epsilon}{t}\right)^\alpha\right)^2 \leq t^{2\alpha} \left(\frac{\epsilon}{t}\right)^2 = t^{2\alpha-2} \epsilon^2 \leq \epsilon^{2\alpha}$ .

Thus, we have  $\frac{(P_0(Y=\perp|x) - P_1(Y=\perp|x))^2}{P_0(Y=\perp|x) + P_1(Y=\perp|x)} = O(\epsilon^{2\alpha} + \epsilon^2)$ .

For  $Y = 1$ , for the denominator,

$$\begin{aligned}
2(P_0(Y = 1|X = t) + P_1(Y = 1|X = t)) &= t^\alpha (1 - t^\beta) + (t - \epsilon)^\alpha (1 - (t - \epsilon)^\beta) \\
&\geq t^\alpha (1 - t^\beta) \\
&\geq t^\alpha \left(1 - \left(\frac{3}{4}\right)^\beta\right)
\end{aligned}$$



For the numerator,

$$\begin{aligned}
& (P_0(Y=1|X=t) - P_1(Y=1|X=t))^2 \\
&= \frac{1}{4} \left( t^\alpha (1-t^\beta) - (t-\epsilon)^\alpha (1-(t-\epsilon)^\beta) \right)^2 \\
&\leq \frac{1}{2} (t^\alpha - (t-\epsilon)^\alpha)^2 + \frac{1}{2} (t^{\alpha+\beta} - (t-\epsilon)^{\alpha+\beta})^2 \\
&= \frac{1}{2} t^{2\alpha} \left( 1 - (1 - \frac{\epsilon}{t})^\alpha \right)^2 + \frac{1}{2} t^{2\alpha+2\beta} \left( 1 - (1 - \frac{\epsilon}{t})^{\alpha+\beta} \right)^2 \\
&\leq \frac{1}{2} t^{2\alpha} \left( 1 - (1 - \frac{\epsilon}{t})^\alpha \right)^2 + \frac{1}{2} t^{2\alpha} \left( 1 - (1 - \frac{\epsilon}{t})^{\alpha+\beta} \right)^2
\end{aligned}$$

If  $\alpha \geq 1$ , by Lemma 13,  $\frac{1}{2} t^{2\alpha} (1 - (1 - \frac{\epsilon}{t})^\alpha)^2 + \frac{1}{2} t^{2\alpha} (1 - (1 - \frac{\epsilon}{t})^{\alpha+\beta})^2 \leq \frac{1}{2} t^{2\alpha} (\alpha \frac{\epsilon}{t})^2 + \frac{1}{2} t^{2\alpha} ((\alpha + \beta) \frac{\epsilon}{t})^2 = \left( \frac{1}{2} \alpha^2 + \frac{1}{2} (\alpha + \beta)^2 \right) t^{2\alpha-2} \epsilon^2$ . Thus,  $\frac{(P_0(Y=1|x) - P_1(Y=1|x))^2}{P_0(Y=1|x) + P_1(Y=1|x)} \leq \left( \frac{1}{2} \alpha^2 + \frac{1}{2} (\alpha + \beta)^2 \right) t^{\alpha-2} \epsilon^2 / \left( 1 - (\frac{3}{4})^\beta \right)$  which is  $O(\epsilon^2)$  if  $\alpha \geq 2$  and  $O(\epsilon^\alpha)$  if  $\alpha \leq 2$ .

If  $\alpha \leq 1$  and  $\alpha + \beta \geq 1$ , by Lemma 13,  $\frac{1}{2} t^{2\alpha} (1 - (1 - \frac{\epsilon}{t})^\alpha)^2 + \frac{1}{2} t^{2\alpha} (1 - (1 - \frac{\epsilon}{t})^{\alpha+\beta})^2 \leq \frac{1}{2} t^{2\alpha} (\frac{\epsilon}{t})^2 + \frac{1}{2} t^{2\alpha} ((\alpha + \beta) \frac{\epsilon}{t})^2 = \left( \frac{1}{2} + \frac{1}{2} (\alpha + \beta)^2 \right) t^{2\alpha-2} \epsilon^2 \leq \left( \frac{1}{2} + \frac{1}{2} (\alpha + \beta)^2 \right) t^{2\alpha-2} \epsilon^2$ . Thus,  $\frac{(P_0(Y=1|x) - P_1(Y=1|x))^2}{P_0(Y=1|x) + P_1(Y=1|x)} \leq \left( \frac{1}{2} + \frac{1}{2} (\alpha + \beta)^2 \right) t^{\alpha-2} \epsilon^2 / \left( 1 - (\frac{3}{4})^\beta \right) = O(\epsilon^\alpha)$ .

If  $\alpha \leq 1, \alpha + \beta \leq 1$ , by Lemma 13,  $\frac{1}{2} t^{2\alpha} (1 - (1 - \frac{\epsilon}{t})^\alpha)^2 + \frac{1}{2} t^{2\alpha} (1 - (1 - \frac{\epsilon}{t})^{\alpha+\beta})^2 \leq \frac{1}{2} t^{2\alpha} (\frac{\epsilon}{t})^2 + \frac{1}{2} t^{2\alpha} (\frac{\epsilon}{t})^2 = t^{2\alpha-2} \epsilon^2$ . Thus,  $\frac{(P_0(Y=1|x) - P_1(Y=1|x))^2}{P_0(Y=1|x) + P_1(Y=1|x)} \leq t^{\alpha-2} \epsilon^2 / \left( 1 - (\frac{3}{4})^\beta \right) = O(\epsilon^\alpha)$ .

Therefore, we have  $\frac{(P_0(Y=1|x) - P_1(Y=1|x))^2}{P_0(Y=1|x) + P_1(Y=1|x)} = O(\epsilon^\alpha + \epsilon^2)$ .

Likewise, we can get  $\frac{(P_0(Y=0|x) - P_1(Y=0|x))^2}{P_0(Y=0|x) + P_1(Y=0|x)} = O(\epsilon^\alpha + \epsilon^2)$ . So we prove  $\sum_y \frac{(P_0(Y=y|x) - P_1(Y=y|x))^2}{P_0(Y=y|x) + P_1(Y=y|x)} = O(\epsilon^\alpha + \epsilon^2)$  when  $x \leq \frac{1}{2}$ . This concludes the proof.  $\square$

### C.3 Other lemmas

**Lemma 12.** ([20], Lemma 4) For sufficiently large  $d > 0$ , there is a subset  $M \subset \{0, 1\}^d$  with following properties: (i)  $|M| \geq 2^{d/48}$ ; (ii)  $\|v - v'\|_0 > \frac{d}{12}$  for any two distinct  $v, v' \in M$ ; (iii) for any  $i = 1, \dots, d$ ,  $\frac{1}{24} \leq \frac{1}{|M|} \sum_{v \in M} v_i \leq \frac{3}{24}$ .

**Lemma 13.** If  $x \leq 1, r \geq 1$ , then  $(1-x)^r \geq 1-rx$  and  $1 - (1-x)^r \leq rx$ .

If  $0 \leq x \leq 1, 0 \leq r \leq 1$ , then  $(1-x)^r \geq \frac{1-x}{1-rx}$  and  $1 - (1-x)^r \leq \frac{rx}{1-(1-r)x} \leq x$ .

Inequalities above are known as Bernoulli's inequalities. One proof can be found in [16].

**Lemma 14.** Suppose  $\epsilon, \tau$  are positive numbers and  $\delta \leq \frac{1}{2}$ . Suppose  $\{Z_i\}_{i=1}^\infty$  is a sequence of i.i.d random variables bounded by 1,  $\mathbb{E}Z_i \geq \tau\epsilon$ , and  $\text{Var}(Z_i) = \sigma^2 \leq 2\epsilon$ . Define  $V_n = \frac{n}{n-1} \left( \sum_{i=1}^n Z_i - \frac{1}{n} \left( \sum_{i=1}^n Z_i \right)^2 \right)$ ,  $q_n = q(n, V_n, \delta)$  as Procedure 2. If  $n \geq \frac{n}{\tau\epsilon} \ln \frac{1}{\delta}$  for some sufficiently large number  $\eta$  (to be specified in the proof), then with probability at least  $1 - \delta$ ,  $\frac{q_n}{n} - \mathbb{E}Z_i \leq -\tau\epsilon/2$ .

*Proof.* By Lemma 9, with probability at least  $1 - \delta$ ,  $V_n \leq 4n\sigma^2 + 8 \ln \frac{1}{\delta}$ , which implies

$$q_n \leq D_1 \left( 1 + \ln \frac{1}{\delta} + \sqrt{\left( 4n\sigma^2 + 9 \ln \frac{1}{\delta} + 1 \right) \left( [\ln \ln]_+ (4n\sigma^2 + 9 \ln \frac{1}{\delta} + 1) + \ln \frac{1}{\delta} \right)} \right)$$

We denote the RHS by  $q$ .

On this event, we have

$$\begin{aligned}
\frac{q_n}{n} - \mathbb{E}Z_i &\leq \frac{q}{n} - \tau\epsilon \\
&= \tau\epsilon \left( \frac{q}{n\tau\epsilon} - 1 \right) \\
&\stackrel{(a)}{\leq} \tau\epsilon \left( \frac{2D_1}{\eta} + \frac{D_1}{\eta \ln \frac{1}{\delta}} \sqrt{\frac{9\eta}{\tau} \ln \frac{1}{\delta} \left( [\ln \ln]_+ \left( \frac{9\eta}{\tau} \ln \frac{1}{\delta} \right) + \ln \frac{1}{\delta} \right) - 1} \right) \\
&= \tau\epsilon \left( \frac{2D_1}{\eta} + D_1 \sqrt{\frac{9}{\eta\tau \ln \frac{1}{\delta}} [\ln \ln]_+ \left( \frac{9\eta}{\tau} \ln \frac{1}{\delta} \right) + \frac{9}{\eta\tau} - 1} \right)
\end{aligned}$$

where (a) follows from  $\frac{q}{n}$  being monotonically decreasing with respect to  $n$ . By choosing  $\eta$  sufficiently large, we have  $\frac{2D_1}{\eta} + D_1 \sqrt{\frac{9}{\eta\tau \ln \frac{1}{\delta}} [\ln \ln]_+ \left( \frac{9\eta}{\tau} \ln \frac{1}{\delta} \right) + \frac{9}{\eta\tau} - 1} \leq -\frac{1}{2}$ , and thus  $\frac{q_n}{n} - \mathbb{E}Z_i \leq -\tau\epsilon/2$ .  $\square$
